# Supplementary material for: Late Pleistocene climate change and population dynamics of Japanese Myodes voles inferred from mitochondrial cytochrome b sequences
Source: PubMed Central journal article supplement — J Mammal. 2019 Jun 19;100(4):1156–68. doi: 10.1093/jmammal/gyz093 (PMC6660811; doi:10.1093/jmammal/gyz093), 2019-06-19
Supplement: gyz093_suppl_supplementary_data_s1.pdf [file gyz093_suppl_supplementary_data_s1.pdf]

## Supplementary Data. SD1. List of sequences used in this study.

| Species             | Locality code<br>or country* Locality | Specimen No. | mtDNA<br>lineage | Accession No.** |
|---------------------|---------------------------------------|--------------|------------------|-----------------|
| Hokkaido, Japan     |                                       |              |                  |                 |
| <i>M. rex</i>       |                                       |              |                  |                 |
| 2                   | Rishiri I.                            | HS229        | I Ib             | AB565454        |
| 2                   | Rishiri I.                            | MAI-25       | I Ib             | AB565455        |
| 2                   | Rishiri I.                            | MAI-28       | I Ib             | AB565456        |
| 3                   | Sarufutsu (Nobusha)                   | TS01495      | I Ia             | <b>LC458484</b> |
| 3                   | Sarufutsu (Nobusha)                   | TS01502      | I Ia             | <b>LC458485</b> |
| 5                   | Hamatonbetsu                          | TS00972      | I Ia             | <b>LC458471</b> |
| 6                   | Teshio                                | HEG74        | I Ia             | AB565457        |
| 6                   | Teshio                                | HEG79        | I Ia             | AB565458        |
| 6                   | Teshio                                | HEG80        | I Ia             | AB565459        |
| 6                   | Teshio                                | TS00675      | I Ia             | <b>LC458472</b> |
| 6                   | Teshio                                | TS00680      | I Ia             | <b>LC458473</b> |
| 7                   | Nakagawa (Saku)                       | TS00730      | I Ia             | <b>LC458474</b> |
| 7                   | Nakagawa (Saku)                       | TS00737      | I Ia             | <b>LC458475</b> |
| 7                   | Nakagawa (Saku)                       | TS00742      | I Ia             | <b>LC458476</b> |
| 9                   | Haboro                                | TS00995      | I Ia             | <b>LC458481</b> |
| 11                  | Takinoue                              | HEG96        | I Ia             | AB031582        |
| 15                  | Takinoshita                           | TS00857      | I Ia             | <b>LC458477</b> |
| 15                  | Takinoshita                           | TS00862      | I Ia             | <b>LC458478</b> |
| 15                  | Takinoshita                           | TS00867      | I Ia             | <b>LC458479</b> |
| 15                  | Takinoshita                           | TS00872      | I Ia             | <b>LC458480</b> |
| 17                  | Biei                                  | HEG174       | I Ia             | AB565460        |
| 22                  | Bibai                                 | TS01676      | I Ia             | <b>LC458482</b> |
| 22                  | Bibai                                 | HEG307       | I Ia             | AB565461        |
| 34                  | Kuromatsunai                          | KN98103      | I Ia             | AB565462        |
| 34                  | Kuromatsunai                          | KN98104      | I Ia             | AB565463        |
| 38                  | Chayagawa                             | TS01618      | I Ia             | LC458483        |
| <i>M. rufocanus</i> |                                       |              |                  |                 |
| 1                   | Rebun I.                              | HEGRB-2      | Ic-2             | AB031554        |
| 2                   | Rishiri I.                            | HS227        | Ic-2             | AB031553        |
| 6                   | Teshio                                | HS273        | Ic-1             | <b>LC416877</b> |
| 6                   | Teshio                                | HS274        | Ic-1             | <b>LC416878</b> |
| 6                   | Teshio                                | HS275        | Ic-1             | <b>LC416879</b> |
| 8                   | Enbetsu                               | TS00043      | Ic-1             | <b>LC416880</b> |
| 8                   | Enbetsu                               | TS00048      | Ic-1             | <b>LC416881</b> |
| 9                   | Haboro                                | TS01249      | Ic-1             | <b>LC416882</b> |
| 10                  | Shibetsu                              | TS01670      | Ic-1             | <b>LC416883</b> |
| 11                  | Takinoue                              | HEG117       | Ic-1             | AB031561        |
| 11                  | Takinoue                              | HEG118       | Ic-1             | AB031562        |
| 11                  | Takinoue                              | HEG121       | Ic-1             | AB031563        |
| 12                  | Kitami                                | HTS244       | Ic-1             | <b>LC416892</b> |
| 12                  | Kitami                                | HTS319       | Ic-1             | <b>LC416893</b> |
| 12                  | Kitami                                | HTS320       | Ic-1             | <b>LC416894</b> |
| 13                  | Koshimizu                             | HS5721       | Ic-1             | <b>LC416884</b> |
| 13                  | Koshimizu                             | HS5722       | Ic-1             | <b>LC416885</b> |
| 13                  | Koshimizu                             | HS5723       | Ic-1             | <b>LC416886</b> |
| 13                  | Koshimizu                             | HS5724       | Ic-1             | <b>LC416887</b> |
| 13                  | Koshimizu                             | HS5725       | Ic-1             | <b>LC416888</b> |
| 13                  | Koshimizu                             | HS5726       | Ic-1             | <b>LC416889</b> |
| 14                  | Shari                                 | KTF387       | Ic-1             | <b>LC416890</b> |
| 14                  | Shari                                 | KTF389       | Ic-1             | <b>LC416891</b> |
| 19                  | Akan                                  | HS619        | Ic-1             | <b>LC416895</b> |
| 19                  | Akan                                  | HS620        | Ic-1             | <b>LC416896</b> |
| 19                  | Akan                                  | HS621        | Ic-1             | <b>LC416897</b> |
| 21                  | Furano                                | TS01712      | Ic-1             | <b>LC416903</b> |
| 22                  | Bibai                                 | TS01688      | Ic-1             | <b>LC416898</b> |
| 22                  | Bibai                                 | TS01692      | Ic-1             | <b>LC416899</b> |
| 22                  | Bibai                                 | TS01693      | Ic-1             | <b>LC416900</b> |

|                   |                         |               |      |                 |
|-------------------|-------------------------|---------------|------|-----------------|
| 22                | Bibai                   | TS01697       | Ic-1 | <b>LC416901</b> |
| 28                | Kiritappu               |               | Ic-1 | AB675434        |
| 29                | Nemuro                  | HEG141        | Ic-1 | AB031555        |
| 29                | Nemuro                  | HEG149        | Ic-1 | AB031556        |
| 29                | Nemuro                  | TS01861       | Ic-1 | <b>LC416902</b> |
| 30                | Tobetsu                 | MRK101        | Ic-1 | AB712373        |
| 30                | Tobetsu                 |               | Ic-1 | AB675439        |
| 30                | Tobetsu                 |               | Ic-1 | AB675440        |
| 30                | Tobetsu                 |               | Ic-1 | AB675441        |
| 31                | Ishikari                | KTF219        | Ic-1 | <b>LC416904</b> |
| 31                | Ishikari                | HTS350        | Ic-1 | <b>LC416905</b> |
| 31                | Ishikari                | HTS380        | Ic-1 | <b>LC416906</b> |
| 31                | Ishikari                | IF5700        | Ic-1 | AY309416        |
| 32                | Sapporo (Jozankei)      | TS00076       | Ic-1 | <b>LC416907</b> |
| 32                | Sapporo (Jozankei)      | TS00128       | Ic-1 | <b>LC416908</b> |
| 33                | Naganuma                | HS231         | Ic-1 | AB031559        |
| 33                | Naganuma                | HS233         | Ic-1 | <b>LC416909</b> |
| 33                | Naganuma                | HS234         | Ic-1 | <b>LC416910</b> |
| 33                | Naganuma                | HS235         | Ic-1 | <b>LC416911</b> |
| 33                | Naganuma                | HS236         | Ic-1 | <b>LC416912</b> |
| 34                | Kuromatsunai            | KN98107       | Ic-1 | AB031557        |
| 34                | Kuromatsunai            | KN98108       | Ic-1 | AB031558        |
| 34                | Kuromatsunai            | HEG1          | Ic-1 | AB031560        |
| 35                | Tarumae                 | TS00691       | Ic-1 | <b>LC416915</b> |
| 36                | Date                    | TS00964.1     | Ic-1 | <b>LC416916</b> |
| 37                | Urakawa                 | TS01654       | Ic-1 | <b>LC416913</b> |
| 37                | Urakawa                 | TS01656       | Ic-1 | <b>LC416914</b> |
| 39                | Yakumo                  | TS00779       | Ic-1 | <b>LC416917</b> |
| 39                | Yakumo                  | TS00783       | Ic-1 | <b>LC416918</b> |
| 39                | Yakumo                  | TS00785       | Ic-1 | <b>LC416919</b> |
| 39                | Yakumo                  | TS00789       | Ic-1 | <b>LC416920</b> |
| <i>M. rutilus</i> |                         |               |      |                 |
| 4                 | Sarufutsu (Onishibetsu) | TS01046       | Vc   | <b>LC458486</b> |
| 5                 | Teshio                  |               | Vc   | KJ789512        |
| 5                 | Teshio                  |               | Vc   | KJ789513        |
| 5                 | Teshio                  |               | Vc   | KJ789514        |
| 12                | Koshimizu               | HS5743        | Vc   | <b>LC416921</b> |
| 12                | Koshimizu               | HS5744        | Vc   | <b>LC416922</b> |
| 12                | Koshimizu               | HS5745        | Vc   | <b>LC416923</b> |
| 12                | Koshimizu               | HS5746        | Vc   | <b>LC416924</b> |
| 12                | Koshimizu               | HS5747/HTS418 | Vc   | <b>LC416925</b> |
| 12                | Koshimizu               | HS5748/HTS419 | Vc   | <b>LC416926</b> |
| 12                | Koshimizu               | KTF14         | Vc   | <b>LC458487</b> |
| 12                | Koshimizu               | KTF15         | Vc   | <b>LC458488</b> |
| 16                | Asahikawa               | KT4176        | Vc   | <b>LC458489</b> |
| 16                | Asahikawa               | KT4178        | Vc   | <b>LC458490</b> |
| 17                | Biei                    |               | Vc   | AB07220         |
| 18                | Oketo                   | TS00627       | Vc   | <b>LC416927</b> |
| 20                | Kawakita                | TS00850       | Vc   | <b>LC458491</b> |
| 23                | Mt. Upepesanke          | KTF431        | Vc   | <b>LC458492</b> |
| 24                | Kamishihoro             | TS00910       | Vc   | <b>LC416928</b> |
| 25                | Ashoro                  |               | Vc   | AB072208        |
| 26                | Kushiro                 |               | Vc   | AB072210        |
| 27                | Akkeshi                 | TS00822       | Vc   | <b>LC416929</b> |
| 27                | Akkeshi                 | TS00823       | Vc   | <b>LC416930</b> |
| 27                | Akkeshi                 | TS00826       | Vc   | <b>LC416931</b> |
| 27                | Akkeshi                 | TS00829       | Vc   | <b>LC416932</b> |
| 27                | Akkeshi                 | TS00834       | Vc   | <b>LC416933</b> |
| 27                | Akkeshi                 | TS01380       | Vc   | <b>LC458494</b> |
| 27                | Akkeshi                 | TS01405       | Vc   | <b>LC458493</b> |
| 27                | Akkeshi                 | TS00835       | Vc   | <b>LC458495</b> |
| 28                | Kiritappu               |               | Vc   | AB072210        |

|                     |                                        |               |         |                 |
|---------------------|----------------------------------------|---------------|---------|-----------------|
| 28                  | Kiritappu                              |               | Vc      | AB072211        |
| 29                  | Nemuro                                 |               | Vc      | AB072213        |
| 29                  | Nemuro                                 |               | Vc      | AB031581        |
| 31                  | Ishikari                               | TS01884       | Vc      | <b>LC458496</b> |
| 31                  | Ishikari                               | TS01894       | Vc      | <b>LC458497</b> |
| Honshu, Japan       |                                        |               |         |                 |
| <i>M. andersoni</i> |                                        |               |         |                 |
| 40                  | Hirosaki, Aomori Pref.                 | YO96Caa-3     | IIIb    | AB037281        |
| 41                  | Zao, Yamagata Pref.                    | NK6404        | IIIb    | KJ556705        |
| 41                  | Zao, Yamagata Pref.                    | NK6405        | IIIb    | KJ556706        |
| 41                  | Zao, Yamagata Pref.                    | NK6454        | IIIb    | KJ556708        |
| 42                  | Urabandai, Fukushima Pref.             | KT2704        | IIIb    | AB037282        |
| 44                  | Namie, Fukushima Pref.                 | KT2694        | IIIb    | AB037283        |
| 46                  | Myoko (Akakura), Niigata Pref.         | KT4100        | IIIa    | <b>LC416934</b> |
| 45                  | Niigata Pref.                          | MH5037        | IIIa    | <b>LC416935</b> |
| 48                  | Oze, Fukushima Pref.                   | HEG97-98      | IIIb    | AB037284        |
| 48                  | Oze, Fukushima Pref.                   | KT2734        | IIIb    | AB037285        |
| 48                  | Oze, Fukushima Pref.                   | KT2737        | IIIb    | AB037286        |
| 49                  | Nikko, Tochigi Pref.                   | KT2690        | IIIb    | AB037287        |
| 49                  | Nikko, Tochigi Pref.                   | KT2703        | IIIb    | AB037288        |
| 50                  | Nagano, Nagano Pref.                   | KT3143        | IIIa    | AB104503        |
| 50                  | Nagano, Nagano Pref.                   | KT3144        | IIIa    | AB104504        |
| 50                  | Nagano, Nagano Pref.                   | HEG167-98     | IIIId-1 | AB104505        |
| 54                  | Chino (Shimokitayama), Nagano Pref.    | MH5037        | IIIa    | AB037289        |
| 54                  | Chino (Shimokitayama), Nagano Pref.    | HEG221-98     | IIIa    | AB037290        |
| 54                  | Chino (Shimokitayama), Nagano Pref.    | HEG222-98     | IIIa    | AB037291        |
| 54                  | Chino (Shimokitayama), Nagano Pref.    | HEG223-98     | IIIa    | AB037292        |
| 51                  | Nagano Pref.                           | MH7114/HS5675 | IIIa    | <b>LC416936</b> |
| 51                  | Nagano Pref.                           | MH7117/HS5676 | IIIa    | <b>LC416937</b> |
| 51                  | Nagano Pref.                           | MH7118/HS5677 | IIIa    | <b>LC416938</b> |
| 51                  | Nagano Pref.                           | MH7438/HS5678 | IIIa    | <b>LC416939</b> |
| 51                  | Nagano Pref.                           | MH7439/HS5679 | IIIa    | <b>LC416940</b> |
| 57                  | Odarumi, Yamanashi Pref.               | KT3730/HS5649 | IIIa    | <b>LC416941</b> |
| 57                  | Odarumi, Yamanashi Pref.               | KT3834/HS5650 | IIIa    | <b>LC416942</b> |
| 57                  | Odarumi, Yamanashi Pref.               | KT3835/HS5651 | IIIa    | <b>LC416943</b> |
| 57                  | Odarumi, Yamanashi Pref.               | KT3837/HS5652 | IIIa    | <b>LC416944</b> |
| 59                  | Minami-Alps (Sensui), Yamanashi Pref.  | KT3701/HS5647 | IIIa    | <b>LC416945</b> |
| 59                  | Minami-Alps (Sensui), Yamanashi Pref.  | KT3710/HS5648 | IIIa    | <b>LC416946</b> |
| 60                  | Minami-Alps (Ryomata), Yamanashi Pref. | KT3628        | IIIa    | <b>LC416947</b> |
| 77                  | Nara Pref.                             | MH4834        | IIIc    | <b>LC416948</b> |
| 79                  | Owase, Mie Pref.                       | MH4835        | IIIc    | AB037299        |
| 79                  | Owase, Mie Pref.                       | YO95Ei-2      | IIIa    | AB037301        |
| 80                  | Shimokitayama, Nara Pref.              | MH4834        | IIIc    | AB037298        |
| 81                  | Kiwa, Mie Pref.                        | ZS2541        | IIIc    | AB037302        |
| 81                  | Kiwa, Mie Pref.                        | ZS2542        | IIIa    | AB037303        |
| 82                  | Kozagawa, Wakayama Pref.               | HEG96Ei-2     | IIIa    | AB037293        |
| 82                  | Kozagawa, Wakayama Pref.               | HEG96Ei-3     | IIIc    | AB037294        |
| 82                  | Kozagawa, Wakayama Pref.               | HEG96Ei-5     | IIIa    | AB037295        |
| 82                  | Kozagawa, Wakayama Pref.               | HEG169-98     | IIIc    | AB037296        |
| 82                  | Kozagawa, Wakayama Pref.               | HEG176-98     | IIIc    | AB037297        |
| <i>M. smithii</i>   |                                        |               |         |                 |
| 43                  | Otama, Fukushima Pref.                 | HS942         | IIIId-1 | AB037304        |
| 46                  | Myoko (Tsubame), Niigata Pref.         | MH7485        | IIIId-1 | <b>LC416949</b> |
| 46                  | Myoko (Tsubame), Niigata Pref.         | MH7486        | IIIId-1 | <b>LC416950</b> |
| 49                  | Oze, Fukushima Pref.                   | HES193-98     | IIIId-1 | AB037305        |
| 47                  | Shigakougen, Nagano Pref.              | HEG225-98     | IIIId-1 | AB037307        |
| 56                  | Matsumoto, Nagano Pref.                | MH7456        | IIIId-1 | <b>LC416951</b> |
| 56                  | Matsumoto, Nagano Pref.                | MH7471        | IIIId-1 | <b>LC416952</b> |
| 52                  | Tomioka, Gunma Pref.                   | HEG224-98     | IIIId-1 | AB037306        |
| 53                  | Ogano, Saitama Pref.                   | HS5634        | IIIId-1 | <b>LC416953</b> |
| 53                  | Ogano, Saitama Pref.                   | HS5635        | IIIId-1 | <b>LC416954</b> |

|                   |                                     |                          |          |                 |
|-------------------|-------------------------------------|--------------------------|----------|-----------------|
| 55                | Hokuto (Kawamata), Yamanashi Pref.  | KT3866/HS5645            | IIIId-1  | <b>LC416955</b> |
| 55                | Hokuto, Yamanashi Pref.             | HS5671/KY34              | IIIId-1  | <b>LC416956</b> |
| 55                | Hokuto (Mizukai), Yamanashi Pref.   | HS5674                   | IIIId-1  | <b>LC416957</b> |
| 55                | Hokuto (Masutomi), Yamanashi Pref.  | HS5670/KY27              | IIIId-1  | <b>LC416958</b> |
| 58                | Hinohara, Tokyo Pref.               | HS5673                   | IIIId-1  | <b>LC416959</b> |
| 61                | Mt. Kenashi, Yamanashi Pref.        | KT3709/HS5640            | IIIId-1  | <b>LC416960</b> |
| 61                | Mt. Kenashi, Yamanashi Pref.        | KT3732/HS5641            | IIIId-1  | <b>LC416961</b> |
| 61                | Mt. Kenashi, Yamanashi Pref.        | KT3822/HS5643            | IIIId-1  | <b>LC416962</b> |
| 62                | Minobu, Yamanashi Pref.             | KT3823/HS5644            | IIIId-1  | <b>LC416963</b> |
| 63                | Kamikushiki, Yamanashi Pref.        | KT3708/HS5639            | IIIId-1  | <b>LC416964</b> |
| 64                | Fujinomiya, Shizuoka Pref.          | KT3745/HS5642            | IIIId-1  | <b>LC416965</b> |
| 64                | Fujinomiya, Shizuoka Pref.          | HS5686                   | IIIId-1  | <b>LC416966</b> |
| 65                | Gotemba, Shizuoka Pref.             | KT3965/HS5672            | IIIId-1  | <b>LC416967</b> |
| 66                | Mt. Daiyu, Kanagawa Pref.           | KT3699/HS5636            | IIIId-1  | <b>LC416968</b> |
| 66                | Mt. Daiyu, Kanagawa Pref.           | KT3707/HS5638            | IIIId-1  | <b>LC416969</b> |
| 66                | Mt. Daiyu, Kanagawa Pref.           | KT3705/HS5637            | IIIId-1  | <b>LC416970</b> |
| 67                | Shiojiri (Sakurazawa), Nagano Pref. | MH7864                   | IIIId-2  | <b>LC416971</b> |
| 67                | Shiojiri (Narai), Nagano Pref.      | MH7862                   | IIIId-1  | <b>LC416972</b> |
| 68                | Kiso, Nagano Pref.                  | MH7894                   | IIIId-1  | <b>LC416973</b> |
| 69                | Oyama, Toyama Pref.                 | MAI-260                  | IIIId-2  | AB104506        |
| 69                | Oyama, Toyama Pref.                 | MAI-261                  | IIIId-2  | AB104507        |
| 70                | Matsuoka, Fukui Pref.               | YO94Ess-1                | IIIId-1  | AB037308        |
| 71                | Ashiu, Kyoto Pref.                  | HS258                    | IIIId-2  | AB037310        |
| 72                | Toyooka, Hyogo Pref.                | MH8143                   | IIIId-2  | <b>LC416974</b> |
| 73                | Mt. Daisen, Tottori Pref.           | MH7514                   | IIIId-2  | <b>LC416975</b> |
| 73                | Mt. Daisen, Tottori Pref.           | MH7515                   | IIIId-2  | <b>LC416976</b> |
| 73                | Mt. Daisen, Tottori Pref.           | MH7550                   | IIIId-2  | <b>LC416977</b> |
| 73                | Mt. Daisen, Tottori Pref.           | MH7551                   | IIIId-2  | <b>LC416978</b> |
| 73                | Mt. Daisen, Tottori Pref.           | MH7552                   | IIIId-2  | <b>LC416979</b> |
| 73                | Mt. Daisen, Tottori Pref.           | MH7576                   | IIIId-2  | <b>LC416980</b> |
| 73                | Mt. Daisen, Tottori Pref.           | MH7578                   | IIIId-2  | <b>LC416981</b> |
| 74                | Simonoseki, Yamaguchi Pref.         | MH7999                   | IIIId-2  | <b>LC416982</b> |
| 75                | Shitara, Aichi Pref.                | HEG111-98                | IIIId-1  | AB037309        |
| 76                | Miyagawa, Mie Pref.                 | HEG96Ess-1               | IIIId-1  | AB104508        |
| 78                | Kitayamamura, Wakayama Pref.        | MH10259                  | IIIId-1  | <b>LC416983</b> |
| Shikoku, Japan    |                                     |                          |          |                 |
| <i>M. smithii</i> |                                     |                          |          |                 |
| 84                | Mt. Tsurugi, Tokushima Pref.        | HEG93-97                 | IV       | AB037311        |
| 84                | Mt. Tsurugi, Tokushima Pref.        | HEG94-97                 | IV       | AB037312        |
| 84                | Mt. Tsurugi, Tokushima Pref.        | HEG101-98                | IV       | AB037313        |
| 84                | Mt. Tsurugi, Tokushima Pref.        | HEG102-98                | IV       | AB037314        |
| 84                | Mt. Tsurugi, Tokushima Pref.        | HS1032                   | IV       | AB037315        |
| Kyushu, Japan     |                                     |                          |          |                 |
| <i>M. smithii</i> |                                     |                          |          |                 |
| 85                | Fukuoka, Fukuoka Pref.              | HS340                    | IIIId-3  | AB037316        |
| China             |                                     |                          |          |                 |
|                   | <i>M. shanseius</i>                 | Ningwu County, Shanxi    | SX10N049 | KY968283        |
| Korea             |                                     |                          |          |                 |
|                   | <i>M. regulus</i>                   |                          | Ia       | JN629046        |
| Russia            |                                     |                          |          |                 |
|                   | <i>M. rufocanus</i>                 | Russian continental part | Ib       | AB676836        |
|                   |                                     | Sakhalin                 | Ib       | AB031576        |
|                   | <i>M. rutilus</i>                   | Russian continental part | Va       | AB072219        |
|                   |                                     | Sakhalin                 | Vb       | AB072223        |
| China             |                                     |                          |          |                 |
|                   | <i>Eothenomys eva</i>               |                          |          | KX354157        |
|                   | <i>Eothenomys chinensis</i>         |                          |          | HM165437        |

\*The numbers indicate collection sites of Japan, as are shown in Fig. 1.

\*\*Accession numbers in bold represent sequences newly determined in this study.
